## **Decoding Odor Mixtures in the Dog Brain: An Awake fMRI Study**

1 **Ashley Prichard<sup>1</sup>, Raveena Chhibber<sup>1</sup>, Jon King<sup>1</sup>, Kate Athanassiades<sup>1</sup>, Mark Spivak<sup>2,3</sup>, &**  
2 **Gregory S. Berns<sup>1\*</sup>**

3 <sup>1</sup>Psychology Department, Emory University, Atlanta, GA 30322

4 <sup>2</sup>Comprehensive Pet Therapy, Inc., Sandy Springs, GA 30328

5 <sup>3</sup>Dog Star Technologies, LLC, Sandy Springs, GA 30328

6 **\* Correspondence:**

7 Corresponding Author: Gregory S. Berns

8 [gberns@emory.edu](mailto:gberns@emory.edu)

9 **Keywords: Dog, odor, mixture, fMRI, RFC, MVPA, decoding, brain**

### 10 **Abstract**

11 In working and practical contexts, dogs rely upon their ability to discriminate a target odor from  
12 distracting odors and other sensory stimuli. Few studies have examined odor discrimination using  
13 non-behavioral methods or have approached odor discrimination from the dog's perspective. Using  
14 awake fMRI in 18 dogs, we examined the neural mechanisms underlying odor discrimination  
15 between two odors and a mixture of the odors. Neural activation was measured during the  
16 presentation of a target odor (A) associated with a food reward, a distractor odor (B) associated with  
17 nothing, and a mixture of the two odors (A+B). Changes in neural activation during the presentations  
18 of the odor stimuli in individual dogs were measured over time within three regions known to be  
19 involved with odor processing: the caudate nucleus, the amygdala, and the olfactory bulbs. Average  
20 activation within the amygdala showed that dogs maximally differentiated between odor stimuli  
21 based on the stimulus-reward associations by the first run, while activation to the mixture (A+B) was  
22 most similar to the no-reward (B) stimulus. To identify the neural representation of odor mixtures in  
23 the dog brain, we used a random forest classifier to compare multilabel (elemental) vs. multiclass  
24 (configural) models. The multiclass model performed much better than the multilabel (weighted-F1  
25 0.44 vs. 0.14), suggesting the odor mixture was processed configurally. Analysis of the subset of  
26 high-performing dogs based on their brain classification metrics revealed a network of olfactory  
27 information-carrying brain regions that included the amygdala, piriform cortex, and posterior  
28 cingulate. These results add further evidence for the configural processing of odor mixtures in dogs  
29 and suggest a novel way to identify high-performers based on brain classification metrics.

### 30 **1. Introduction**

31 For working purposes, trained dogs are generally considered the most practical and effective means  
32 of identifying target substances. In many cases, detection dogs are selectively bred for olfactory  
33 capabilities and behavioral traits that are correlated with their effectiveness in the field. Given their  
34 roles in national security and in detecting different diseases, hunting for pests, and tracking  
35 endangered species for conservation efforts, odor detection dogs remain in high demand (Bijland,  
36 Bomers, & Smulders, 2013; Cooper, Wang, & Singh, 2014; Davidson, Clark, Johnson, Waits, &  
37 Adams, 2014; Gadbois & Reeve, 2014). Research regarding dogs' olfactory abilities typically  
38 focuses on the improvement of detection behaviors and trainability. Despite numerous behavioral

39 studies, little is known about the way in which olfactory information is interpreted by the canine  
40 brain. Few studies on canine olfaction approach the topic from the canine's point of view or without  
41 responses mediated by the dog's handler. While behavior is a necessary measure of a working dog's  
42 effectiveness, a dog's behavior can be biased by unconscious cues given by their handler.

43 Large gaps remain in our understanding of how dogs process odors or discriminate between pure  
44 odors and their mixtures. For instance, it is unknown whether dogs search for the complete odor  
45 signature of a target substance or whether only some components serve as a target odor (Johnen,  
46 Heuwieser, & Fischer-Tenhagen, 2017). Despite substantial training on odor components, a dog's  
47 behavioral responses to mixtures often cannot be predicted. This may be because the detection of  
48 individual substances within a mixture depends on chemical interactions between the different  
49 components. Given that most odor discrimination tests for dogs are behaviorally based and/or  
50 unstandardized, it is almost impossible to predict which components of an odor a particular dog uses  
51 to identify the target (Göth, McLean, & Trevelyan, 2003). For example, dogs that were trained to  
52 detect pure potassium chlorate failed to reliably detect potassium chlorate-based explosive mixtures  
53 (Lazarowski & Dorman, 2014). Whereas dogs trained on odor mixtures tend to perform better on  
54 detection tasks than when trained on pure odors (Hall & Wynne, 2018). These findings highlight the  
55 potential limitations of training dogs to detect a specific target odor to then indicate to the target  
56 when mixed with distractors (DeGreeff et al., 2017; Hayes, McGreevy, Forbes, Laing, & Stuetz,  
57 2018). The way in which this information is interpreted by the canine brain also remains under-  
58 researched, but it is likely a complex and contextually dependent process (Berns, Brooks, & Spivak,  
59 2015; Hayes et al., 2018; Prichard, Chhibber, Athanassiades, Spivak, & Berns, 2018; Siniscalchi,  
60 2016). Considering that olfactory neuroanatomy is highly conserved among animals, studies of  
61 olfactory processing in dogs may also shed light on similar mechanisms in humans (Ache & Young,  
62 2005).

63 The brain may have specialized representations for olfactory associations (Yeshurun, Lapid, Dudai,  
64 & Sobel, 2009). In humans, studies of odor perception typically rely on self-report measures and use  
65 suprathreshold odors that are easily detectible. Functional magnetic resonance imaging (fMRI) of an  
66 olfactory matching or identification task has demonstrated activation in the primary and secondary  
67 olfactory regions including: the piriform cortex, insula, amygdala, parahippocampal gyrus, caudate  
68 nucleus, inferior frontal gyrus, middle frontal gyrus, superior temporal gyrus, and cerebellum (Vedaei  
69 et al., 2017). Low level odors that go unnoticed by participants can also alter brain activation in the  
70 piriform cortex and thalamus (Lorig, 2012). Most of these studies have contributed to the  
71 identification of odor processing regions, but fewer have identified the regions' roles during odor  
72 processing or learning during conditioning to odor stimuli. Regions that are thought to support  
73 conditioned associations to odors include the orbitofrontal and perirhinal cortices (Howard, Kahnt, &  
74 Gottfried, 2016; Qu, Kahnt, Cole, & Gottfried, 2016).

75 More recent studies of human olfactory perception have implemented machine learning strategies to  
76 decode odor representation within the brain. fMRI decoding methods can reveal regions important  
77 for coding valence, expected outcomes, or stimulus identity. Machine learning approaches, such as  
78 multi-voxel pattern analysis (MVPA) or representational similarity analysis (RSA), identify patterns  
79 of activation from regions that might not show a change in mean activation with univariate measures  
80 (Haxby, Connolly, & Guntupalli, 2014; Kahnt, 2018; Kahnt, Park, Haynes, & Tobler, 2014). In  
81 another study using RSA suggested that the spatial and temporal pattern of activation within the  
82 amygdala codes for odor valence (Jin, Zelano, Gottfried, & Mohanty, 2015).

83 While these studies report similar regions important for odor discrimination identified in traditional  
84 univariate fMRI analyses, the relationship of odor mixtures to the brain's representation of odor  
85 components remains unknown (Howard & Gottfried, 2014; Howard, Gottfried, Tobler, & Kahnt,  
86 2015; Howard et al., 2016). Odor mixtures may be represented in the brain based on their  
87 components (elemental) or may be perceived as configural, creating an odor concept (Thomas-  
88 Danguin et al., 2014). FMRI studies on human perception of odor mixtures shows that activation in  
89 the insula increases when the participant experiences the mixture containing the target odor, even  
90 when participants report that they are unable to distinguish the mixture with and without the target  
91 (Hummel, Olgun, Gerber, Huchel, & Frasnelli, 2013). However, other regions identified in this study  
92 included voxel sizes that would not pass whole brain corrections for multiple comparisons, requiring  
93 further study to confirm these brain regions' roles in the perception of odor mixtures. Despite the  
94 need for the study of human olfactory perception at the neural level, no research has yet investigated  
95 similar considerations in the dog (Hayes et al., 2018).

96 Studies of canine cognition using fMRI are becoming more common, including the adaptation of  
97 human experimental paradigms and analyses. With appropriate selection and training, dogs can be  
98 willing participants in fMRI and show little anxiety in the testing environment as it is similar to their  
99 shared environment with humans. Due to domestication, dogs are also more likely attuned to stimuli  
100 relevant to humans as opposed to stimuli salient to other model species. Since 2012, dog fMRI has  
101 revealed some of the conserved neural mechanisms underlying perception across species (Berns,  
102 Brooks, & Spivak, 2012). Dogs have a region for processing both human and dog faces similar to  
103 that of primates (Cuaya, Hernandez-Perez, & Concha, 2016; Dilks et al., 2015). Dogs show  
104 differential activation in the reward processing regions of the brain such as the caudate nucleus to  
105 social or food rewards (Cook, Prichard, Spivak, & Berns, 2016). And dogs show higher activation in  
106 the amygdala and caudate to odors associated with familiar humans and dogs than to odors of  
107 strangers (Berns et al., 2015). Canine fMRI studies have also revealed neural biases for stimulus  
108 modalities, suggesting that dogs learn visual and odor stimuli at a faster rate than verbal stimuli, and  
109 that differences in activation are most evident in the amygdala and caudate (Prichard, Chhibber, et  
110 al., 2018). Finally, MVPA analysis of dog fMRI data revealed that dogs and humans have similar  
111 brain regions for the representation of semantic knowledge in the form of words associated with  
112 objects (Prichard, Cook, Spivak, Chhibber, & Berns, 2018). Together, these studies suggest that dogs  
113 are not only willing fMRI participants, but that the existence of functionally similar brain regions  
114 shared by dogs and humans make them an appropriate model species for further research.

115 To examine the neural mechanisms underlying a dog's classification of odor mixtures, we measured  
116 the fMRI response to two previously trained odors (one associated with reward and one not)  
117 (Prichard, Chhibber, et al., 2018) and to a mixture of the two odors. First, we used univariate  
118 analyses on mean activation levels within the olfactory bulb, amygdala, and caudate nucleus to  
119 determine whether the mixture was more similar to the pure reward or no-reward odors. Second, we  
120 used a random forest classifier (RFC) for: a) whole-brain decoding of odor identity; b) determination  
121 of whether a mixture is processed elementally or configurally; and c) identification of additional  
122 regions for odor classification in the dog's brain.

## 123 **2. MATERIALS AND METHODS**

### 124 **2.1 Participants**

125 Participants were 18 pet dogs volunteered by their Atlanta owners for fMRI training and fMRI  
126 studies (Berns, Brooks, & Spivak, 2013; Berns et al., 2012; Berns & Cook, 2016; Cook et al., 2016).

127 All dogs had previously completed four or more awake fMRI scans, including previous training on  
128 the two odors used in the current study (Prichard, Chhibber, et al., 2018). No physical or chemical  
129 restraint was implemented. The study utilized odor stimuli that each dog had previously experienced  
130 within the scanner environment. This study was performed in accordance with the recommendations  
131 in the Guide for the Care and Use of Laboratory Animals of the National Institutes of Health. The  
132 study was approved by the Emory University IACUC (Protocols DAR-4000079-ENTPR-A and  
133 PROTO201700572), and all owners gave written consent for their dog's participation in the study.

## 134 **2.2 Stimuli**

135 Olfactory stimuli were aqueous solutions of isoamyl acetate (IA), hexanol (Hex), and a mixture of the  
136 two calculated to result in approximately 5 ppm in the headspace of the container. Partial vapor  
137 pressures were calculated based on the molecular weight and reported vapor pressures of 4 mmHg  
138 and 0.9 mmHg respectively, obtained from PubChem ([pubchem.ncbi.nlm.nih.gov](http://pubchem.ncbi.nlm.nih.gov)). The odorants  
139 were miscible with water and the partial pressure of the odorant was the product of the pure odorant  
140 vapor pressure and the mole fraction of the odorant. The final dilutions in water were 0.12 mL/L for  
141 IA, 0.44 mL/L for Hex.

142 Odorants were delivered using an MRI-compatible olfactometer used in a previous study and similar  
143 to those constructed for human olfactory imaging studies (Bestgen et al., 2016; Lowen & Lukas,  
144 2006; Prichard, Chhibber, et al., 2018; Sezille et al., 2013; Sommer et al., 2012; Toledano et al.,  
145 2012; Vigouroux, Bertrand, Farget, Plailly, & Royet, 2005). Briefly, odorants were delivered using a  
146 continuous stream of air from an aquarium grade air pump (EcoPlus Commercial Air Pump 1030  
147 GPH) through a Drierite filter ([drierite.com](http://drierite.com)), and through a 4-way plastic splitter to three plastic 100  
148 mL jars containing 50 ml of odorant solutions and one jar containing 50 ml of water to serve as a  
149 control. Each solution mixed with a continuous air stream. The experimenter used plastic valves to  
150 control directional flow of odorized air through 10' of 1/8" ID Teflon tube, where the mixture (air  
151 dilution of the odorant) exited a PVC tube with a 1" diameter opening positioned in the MRI bore  
152 12" from the dog's snout (Fig. 1). The fourth tube carrying air from the control jar remained open  
153 throughout the presentations of odorized air, maintaining a steady air stream presented to the dog and  
154 assisting in the clearing of lingering odor within the magnet bore.

## 155 **2.3 Experimental Design**

156 Dogs entered and stationed themselves in custom chin rests in the scanner bore. All scans took place  
157 in the presence of the dog's primary owner, who stood throughout the scan at the opening of the  
158 magnet bore, directly in front of the dogs, and delivered all rewards (hot dogs) to the dog. The owner  
159 was present to minimize any anxiety that the dog may experience due to separation, consistent with  
160 studies involving pets or human infants. An experimenter was stationed next to the owner, out of  
161 view of the dog. The experimenter controlled the timing and presentation of odor stimuli to the dogs  
162 via a four-button MRI-compatible button box. Onset of each stimulus was timestamped by the  
163 simultaneous press of the button box with the opening of the appropriate valve. Manual control of the  
164 stimuli by the experimenter was necessary, as opposed to a scripted presentation, because of the  
165 variable time it takes dogs to consume food rewards.

166 In a previous study, dogs were semi-randomly assigned IA or Hex as the reward stimulus such that  
167 roughly half of the dogs were assigned to each group (see Table 1) (Prichard, Chhibber, et al., 2018).  
168 In the current study, the same dogs were presented with the two previously trained odors, as well as a  
169 mixture of the two. An event-based design was used, consisting of reward, no-reward, and mixture  
170 trial types. On reward trials, the odor stimulus was presented for a fixed duration, which was

171 followed by the delivery of a food reward. During no-reward trials and mixture trials, the no-reward  
172 or mixture odor stimuli were presented for the same fixed duration and were followed by nothing.  
173 Each dog received the same trial sequence. For each trial type, dogs were presented an odor for an  
174 initial 3.6s during a span of 7.2 s, followed by a reward (hot dog) or nothing, with a 9.6 s inter trial  
175 interval between odor presentations.

176 Each scan session consisted of 4 runs, lasting approximately 9 minutes per run. Each run consisted of  
177 22 trials (~8 reward, ~8 no-reward, ~5 mixture) with a semi-randomized presentation order, for a  
178 total of 88 trials per scan session. Twenty-two mixture trials were included to serve as a sufficient  
179 number of probe trials for fMRI analyses while minimizing mixture-outcome associations. No trial  
180 type was repeated more than 3 times sequentially, as dogs could habituate to the stimulus. Following  
181 each run, dogs would exit the scanner and relax, drink water, or stay in the scanner to complete the  
182 next run.

183 Scanning was conducted with a Siemens 3 T Trio whole-body scanner using procedures described  
184 previously (Berns et al., 2013; Berns et al., 2012). During the first of the four runs, a T2-weighted  
185 structural image of the whole brain was acquired using a turbo spin-echo sequence (25-36 2mm  
186 slices, TR = 3940 ms, TE = 8.9 ms, flip angle = 131°, 26 echo trains, 128 x 128 matrix, FOV = 192  
187 mm). The functional scans used a single-shot echo-planar imaging (EPI) sequence to acquire  
188 volumes of 22 sequential 2.5 mm slices with a 20% gap (TE = 25 ms, TR = 1200 ms, flip angle =  
189 70°, 64 x 64 matrix, 3 mm in-plane voxel size, FOV = 192 mm). Slices were oriented dorsally to the  
190 dog's brain (coronal to the magnet, as in the sphinx position the dogs' heads were positioned 90  
191 degrees from the prone human orientation) with the phase-encoding direction right-to-left. Sequential  
192 slices were used to minimize between-plane offsets from participant movement, while the 20% slice  
193 gap minimized the "crosstalk" that can occur with sequential scan sequences. Four runs of up to 400  
194 functional volumes were acquired for each subject, with each run lasting about 9 minutes.

## 195 **2.4 Analyses**

### 196 **2.4.1 Preprocessing**

197 Preprocessing of the fMRI data included motion correction, censoring, and normalization using  
198 AFNI (NIH) and its associated functions. Two-pass, six-parameter rigid-body motion correction was  
199 used based on a hand-selected reference volume for each dog that corresponded to their average  
200 position within the magnet bore across runs. Aggressive censoring removed unusable volumes from  
201 the fMRI time sequence because dogs can move between trials, when smelling an odor, and when  
202 consuming rewards. Data were censored when estimated motion was greater than 1 mm displacement  
203 scan-to-scan and based on outlier voxel signal intensities greater than 0.1 percent signal change from  
204 scan-to-scan. Smoothing, normalization, and motion correction parameters were identical to those  
205 described in previous studies (Prichard, Chhibber, et al., 2018). EPI images were smoothed and  
206 normalized to %-signal change with 3dmerge using a 6mm kernel at full-width half-maximum. The  
207 Advanced Normalization Tools (ANTs) software was used to register the mean of the motion-  
208 corrected functional images (Avants et al., 2011) to the individual dog's structural image.

### 209 **2.4.2 Region of Interest (ROI) Analysis**

210 Each subject's motion-corrected, censored, smoothed images were analyzed within a general linear  
211 model (GLM) for each voxel in the brain using 3dDeconvolve (part of the AFNI suite). Motion time  
212 courses were generated through motion correction, and constant, linear, quadratic, cubic, and quartic  
213 drift terms were included as nuisance regressors. Drift terms were included for each run to account  
214 for baseline shifts between runs as well as slow drifts unrelated to the experiment. Task related

215 regressors for each experiment were modeled using AFNI's dmUBLOCK and stim\_times\_IM  
216 functions and were as follows: (1) reward stimulus, (2) no-reward stimulus, 3) mixture stimulus. The  
217 function created a column in the design matrix for each of the 88 trials, allowing for the estimation of  
218 a beta value for each trial. Trials with beta values greater than an absolute three percent signal change  
219 were removed prior to analyses as described in Prichard et al. (2018) as these were assumed to be  
220 beyond the physiologic range of the BOLD signal and possibly the result of spin-history effects and  
221 spurious levels of activation unrelated to the experiment.

222 Anatomical ROIs were selected based on imaging results in canine brain areas previously observed to  
223 be responsive to olfactory stimuli (Berns et al., 2015; Jia et al., 2014). Anatomical ROIs of the left  
224 and right caudate nuclei, the left and right amygdala, and the olfactory bulbs were defined  
225 structurally using each dog's T2-weighted structural image of the whole brain (Fig. 2). Beta values  
226 for each presentation of reward stimuli (33 trials), no-reward stimuli (33 trials), and mixture stimuli  
227 (22 trials) were extracted from and averaged over the ROIs in the left and right hemispheres. For  
228 each ROI (amygdala, caudate, olfactory bulb), we used the mixed-model procedure in SPSS 24  
229 (IBM) with fixed-effects for the intercept, run number, type (reward, no-reward, mixture), and  
230 hemisphere (left or right), identity covariance structure, and maximum-likelihood estimation. Run  
231 was modeled as a fixed effect, making no assumptions about the time course. As hemisphere did not  
232 account for a significant amount of variance, data were collapsed across hemispheres and analyses  
233 removed hemisphere as a factor.

### 234 **2.4.3 Multivariate Decoding**

235 For this exploratory analysis, our aim was to identify regions in the dog brain that contribute to the  
236 classification of odor stimuli outside of those identified in the univariate analysis. Univariate analyses  
237 may answer the question if odor mixtures result in differences in regional brain activity, but  
238 multivariate methods are required if the identity of odors is distributed in patterns of neural activity.  
239 The primary question was whether dogs treat odor mixtures as elemental or configural. As in  
240 previous decoding human fMRI studies, we used scikit-learn's random forest classifier (RFC). RFC  
241 has previously demonstrated robust performance on human fMRI data and has the ability to handle  
242 complex biological data (Lebedev et al., 2014). RFCs generally perform better than most linear  
243 classifiers and require less parameter tuning (Chollet, 2018). An RFC also allows for mapping of  
244 feature importance in the brain without resorting to searchlight analyses. Thus, in addition to  
245 generating whole-brain classification metrics, the relative importance of individual regions to the  
246 classification can be obtained.

247 The volumes from the current study were concatenated with data from the previous study in which  
248 dogs were presented odors associated with reward and no reward in a classical conditioning paradigm  
249 (Prichard, Chhibber, et al., 2018), yielding a total of 176 separate odor trials. As described in the  
250 above GLM, preprocessing included censoring of the unsmoothed volumes for motion and outliers.  
251 Using AFNI's 3dDeconvolve stim\_times\_IM function, we generated a whole-brain model of trial-by-  
252 trial beta estimates for each trial type (reward, no reward, and mixture). The anatomical masks from  
253 the ROI analysis described above were used to extract average beta values from the left and right  
254 caudate for each trial. As in the univariate analysis, trials with beta values greater than  $|3\%|$  were  
255 removed prior to further analyses. Using AFNI's 3dmerge tool, the remaining whole brain volumes  
256 were smoothed with a kernel of 6 mm to improve signal-to-noise ratios. The whole brain volumes  
257 were used as input for the classifiers below. To reformat the imaging data for use in the sklearn  
258 environment, the volumes were masked and reshaped using Nilearn's NiftiMasker class and split into  
259 training and testing sets using the python library *pandas*.

260 Two different models were tested: elemental and configural. For the elemental model, trials were  
261 coded using a 2-bit vector with bits for odor A and odor B. In this scheme, trials with the two pure  
262 odorants were coded as [1 0] and [0 1] while the mixture was coded as [1 1]. In contrast, the  
263 configural model assumed that the mixture was a distinct class and was coded as such. Here, the  
264 classes were simply A, B, and C. The primary difference between these two models was multilabel  
265 vs. multiclass.

266 For both models, the RFC was instantiated in each dog by making 100 forests, each forest consisting  
267 of 100 trees with a `max_depth` of 5, `min_samples_split` of .25, `bootstrapping` as true, and  
268 `max_features` as log2. We used 100 forests of 100 trees to ensure that all volumes served as samples.  
269 A `max_depth` of 5, `min_samples_split` of .25 and `max_features` of log2 were included to prevent  
270 overfitting to the training set. Each dog's data was split into odd and even runs (2-fold split) for  
271 training and testing. For training each forest, an equal number of exemplars from each class was  
272 randomly selected. Unselected trials were added to the test set. For each trial of the test set, the  
273 classifier predicted whether the stimulus presented was reward, no reward, or mixture. From this, we  
274 calculated the confusion matrix for each dog, aggregating over the 100 forests. The primary metrics  
275 obtained were recall, precision, and the F1-score (a weighted average of recall and precision).

276 Each forest also produced a map of feature importances. Briefly, the feature importance is a value  
277 scaled between 0 and 1 that reflects how informative a voxel i.e. a larger feature importance  
278 corresponds to a voxel that is more informative in making the final predictions. Higher feature  
279 importances are driven by either voxels that increase accuracy drastically, or by voxels that are  
280 present in many trees within a forest. Sklearn's RFC `feature_importances_` method returned feature  
281 importances for each voxel that were subsequently back-mapped into each individual dog's  
282 functional space, generating one map per forest. All 100 maps for each dog were averaged to assess  
283 which brain regions contributed to the classification reward, no reward, and mixture. Mean images  
284 for each dog were spatially normalized to template space using The Advanced Normalization Tools  
285 (ANTs) software (Avants et al., 2011; Datta et al., 2012).

286 To determine the significance of both the confusion matrices and feature importance maps, we  
287 followed the permutation approach outlined by Stelzer et al. (2013) and which we used previously to  
288 identify the significance of regions for language processing in dogs (Prichard, Cook, et al., 2018;  
289 Stelzer, Chen, & Turner, 2013). For each dog, a random number was appended to the data labels for  
290 each trial to reorder the labels and create a permuted list of labels, while the timeseries of fMRI  
291 volumes remained unchanged. The RFC was trained and tested on this set of permuted labels and the  
292 fMRI volumes 100 times, outputting a confusion matrix and a map of feature importances for each  
293 forest. As we did with our real dataset above, we then averaged across these 100 forests, creating one  
294 confusion matrix and one mean image per set of permuted labels. We repeated this procedure 100  
295 times to create a distribution of confusion matrices and feature importance maps for each dog.

296 For each confusion matrix, we computed the weighted F1 score. This allowed us to calculate the  
297 cumulative distribution of F1 scores for the permuted data, which then allowed an estimation of the  
298 significance of the actual F1 score for the real data. As we were interested in identifying additional  
299 brain regions involved in the identification of odors, we included those dogs whose whole-brain  
300 classifier performed substantially above chance. Only dogs who had a real F1 greater than the 90<sup>th</sup>  
301 percentile of the null distribution were used to create a group feature importance map.

302 To simulate the group image across dogs, we randomly selected one mean permuted image per dog,  
303 normalized that mean image to template space, and averaged across the dogs comprising the group

304 map – i.e. those dogs whose F1 was greater than the 90<sup>th</sup> percentile of their null distribution. This  
305 random selection and normalization were repeated 10,000 times. Because each voxel in the brain  
306 may have a different distribution given its location in the brain, we did not assume a canonical  
307 distribution across all voxels and opted to make a voxel-wise distribution. For each voxel in the  
308 brain, we created the distribution from the 10,000 noise maps and determined the values for  $p =$   
309 0.005. This map of thresholds was applied to the mean feature importance map created from the real  
310 data and to each of the 10,000 noise maps (Fig. 3). To determine the significance of any clusters  
311 found after thresholding at the voxel-wise level, we created a distribution of cluster sizes found in the  
312 thresholded 10,000 noise maps.

### 313 **3. RESULTS**

#### 314 **3.1 Univariate**

315 Changes in neural activation during the presentations of the odor stimuli in individual dogs were  
316 measured over time within the three ROIs known to be involved with odor processing. Using the  
317 mixed-model procedure in SPSS 24 (IBM) we found neural evidence for differentiation of the three  
318 odor stimuli across all ROIs ( $p = 0.004$ ), which varied significantly by Odor Type ( $p < 0.001$ ). There  
319 was a significant interaction between Odor Type x Run ( $p = 0.031$ ), suggesting the magnitude of the  
320 effect changed over time.

321 As there was a main effect of ROI, we used post-hoc analyses to examine whether these differences  
322 remained when segregated by ROI (Table 2 & Fig. 4). In the caudate, we found a significant  
323 interaction between Odor Type x Run ( $p = 0.019$ ) (Fig. 5A), but no main effect of Odor Type or Run.  
324 More robust evidence for the differentiation between odor stimuli was evident in the amygdala for  
325 Odor Type ( $p < 0.0001$ ) (Fig. 5B), suggesting that the odor-outcome associations were reinstated  
326 from the previous study. There was also an Odor Type x Run interaction, suggesting a difference in  
327 the temporal pattern between odor types ( $p = 0.028$ ). Similar to human olfaction studies, we found  
328 initial evidence for the differentiation of Odor Type in the olfactory bulbs ( $p = 0.029$ ) (Fig. 5C).

329 In sum, the differences in neural activation across regions of the olfactory pathway show that dogs  
330 formed odor stimulus-reward associations. Though the differentiation between the three odor stimuli  
331 was most pronounced in the amygdala, similarity in activation between the no reward and mixture  
332 stimuli across all three ROIs suggested that the mixture was most like the no reward stimulus.  
333 However, when we tested whether the sum of activations to reward and no reward odors was the  
334 same as the activation to the mixture, we found significant differences in the amygdala, such that the  
335 sum of activations was greater than activation to mixture ( $t(17) = 3.28, p = 0.004$ ). This suggests that  
336 mixture was, in fact, processed differently than the simple sum of its components. To further test this  
337 theory, multivariate decoding was performed.

#### 338 **3.2 Multivariate Decoding**

339 Based on the weighted-F1 score, the multiclass model performed much better than the multilabel  
340 model (F1: 0.44 vs. 0.14) (Table 3). The multiclass model had an average recall of 0.40, which was  
341 better than the chance value of 0.33, while the multilabel model had very poor recall (0.19), in effect,  
342 predicting most stimuli as the mixture, including the pure odorants. Using the permuted data as a  
343 reference null distribution of F1 scores, we determined that the real data from 8 dogs passed the 90<sup>th</sup>  
344 percentile (Bhubo, Caylin, Eddie, Kady, Koda, Ohana, Wil, and Zen). These dogs were then used to  
345 construct the whole brain map of informative voxels.



346 For these eight dogs, the feature importances of their multiclass models were backprojected into their  
347 brains, transformed to the atlas space, and then averaged. Only those voxels that passed the  
348 individual significance of  $p = 0.005$  were used. Across these eight dogs, clusters with more than 2  
349 voxels were used to create a cumulative distribution of possible cluster sizes. A cluster size of 98  
350 voxels corresponded to  $p = 0.001$ . At this voxel and cluster threshold, three clusters were identified  
351 (Fig. 6). Two clusters surrounded the amygdala – one rostrally and one caudally. The third cluster  
352 was located in the posterior cingulate.

#### 353 **4. Discussion**

354 Here, we show fMRI evidence that dogs' brains tended to classify odor mixtures configurally. To test  
355 neural mechanisms of dogs' perception of odors and a mixture, we used fMRI to examine changes in  
356 brain activation to previously trained odors associated with reward or no reward, as well as a mixture  
357 of the two. Our results suggest that while dogs may have different odor-outcome associations with  
358 each individual odor, they perceive the combination of odors as a new odor. In reward processing  
359 regions of the brain, we anticipated that if dogs treat mixtures as the sum of their components, then  
360 the neural activation to the mixture should be equivalent to the sum of the activation to the reward  
361 and no reward components. However, significant differences in activation within the amygdala  
362 showed that dogs did not treat these as equivalent conditions.

363 Further, using machine learning, we identified additional regions of the dog brain, including the peri-  
364 amygdalar cortex and the posterior cingulate that significantly predicted the identity of the odor  
365 beyond the regions specified in *a priori* hypotheses. Moreover, we found that a multilabel model  
366 significantly outperformed a multilabel model, further supporting the conclusion that dogs processed  
367 the mixture configurally rather than elementally.

368 One possible explanation for our results is that the dogs' perception of odor mixtures may depend on  
369 the combined ratio of the odor elements. For example, rabbits trained on a target odor B treated the  
370 A+B (ratio 68/32) mixture as elemental but the A+B (ratio 30/70) mixture as configural (Schneider et  
371 al., 2016). As our study utilized a 50/50 mixture, we cannot similarly conclude ratio-based  
372 differences in elemental or configural processing of odor mixtures in the dog brain. However a  
373 second possible explanation is that dogs classify mixtures as themselves as in the 3-way model, but  
374 when limited to two classes as in the 2-way model, dogs' neural biases for novelty influences  
375 predictions toward the distractor odor (Prichard, Cook, et al., 2018).

376 Because the univariate model suggested that dogs treat mixtures as more like the no reward stimulus  
377 than the reward stimulus, the mechanism underlying dogs' discrimination of odor mixtures may have  
378 been a learned association between the mixture with absence of reward. The apparent differences in  
379 activation in the caudate nucleus and amygdala to odor stimuli associated with reward or no reward  
380 suggested that perception changed over time, consistent with a learned discrimination. The  
381 significant differential effect for reward versus no-reward across multiple ROIs is therefore  
382 consistent with prior research, showing that reward processing regions of the canine brain change in  
383 activation relative to the value of conditioned stimuli regardless of modality (Cook et al., 2016;  
384 Prichard, Chhibber, et al., 2018). Further, we have previously shown that in an associative reward  
385 learning paradigm, changes in the neural activation within the caudate and amygdala within an initial  
386 span of 6 minutes, suggesting that a mixture-no reward association could also form quickly (Prichard,  
387 Chhibber, et al., 2018). If true, the overall activations in the amygdala and caudate might simply  
388 index their relative salience, but not their full identities.

389 The RFC identified regions important for odor processing similar to those in the human studies,  
390 including the amygdala, piriform cortex, and posterior cingulate. In human classical conditioning  
391 paradigm using odors, MVPA analyses revealed predictive representations of identity-specific reward  
392 in OFC and identity general reward in vmPFC. Reward related functional coupling between OFC and  
393 piriform cortex and between vmPFC and amygdala further revealed parallel pathways that support  
394 identity-specific and general predictive signaling (Howard et al., 2015; Howard et al., 2016; Zelano,  
395 Mohanty, & Gottfried, 2011). Our study also mirrors some of the results examining human's  
396 perception of odor mixtures. In humans, common neural activation patterns in the superior temporal  
397 gyrus, caudate nucleus, and insula occur in response to mixtures containing pleasant and unpleasant  
398 odors (Bensafi et al., 2012). Given the similar results to human studies, this suggests that shared  
399 neural mechanisms may exist across species for odor processing. Further, we show that RFC is a  
400 successful classifier for fMRI analyses, with the caution that specific classifiers may be better suited  
401 for some studies over others (Misaki, Kim, Bandettini, & Kriegeskorte, 2010).

402 What does this mean for odor processing in dogs? Understanding how a dog discriminates between  
403 odor mixtures can aid in the design of more effective protocols to increase a dog's performance on  
404 odor detection and identification tasks. Protocols designed based on the dogs' perceptual abilities are  
405 less prone to biases inherent to behavioral studies (e.g. the Clever Hans effect) that require human-  
406 reported measures. In addition, the dogs' perception of the mixture stimulus in our study suggests  
407 that dogs perceive the mixture as a new odor rather than as its individual elements. Consistent with  
408 previous behavioral studies, this may explain why dogs trained on individual target odors have  
409 difficulty generalizing to mixtures, but dogs trained on mixtures perform well on detection tasks and  
410 detect the target odor when mixed with novel distractors (Hall & Wynne, 2018; Lazarowski &  
411 Dorman, 2014; Lazarowski et al., 2015). Further, dogs' brain activations showed more similarity  
412 between the mixture of odors and a no reward odor, suggesting either a learned association or a  
413 neural bias toward the no reward odor. Treating a mixture as a novel odor, or having bias toward the  
414 no reward component of a mixture, would likely lead to increased false-negatives during a detection  
415 task whereas a learned association for mixtures may conflict with detection applications. Knowledge  
416 of dogs' classification of odor mixtures in the dog brain should improve training practices for  
417 working dogs and highlight the potential learning aspects inherent in mixture detection tasks.  
418 Perceptually driven protocols may therefore enhance a working dog's detection performance,  
419 contributing to the health and safety of humans.

420 The opportunity to study the neural mechanisms of odor processing in an awake dog also offers two  
421 clear advantages over the study of odor processing in humans. First, unlike human studies, dog fMRI  
422 offers a unique opportunity to study odor processing in primary sensory areas like the olfactory bulbs  
423 given its large size relative to the rest of the dog brain. In humans, the olfactory bulbs is  
424 proportionately smaller than in canines, making imaging difficult due to its size and the susceptibility  
425 artifact around the sinuses. In our study, the olfactory bulbs were structurally defined in each dog  
426 prior to analysis, allowing us to account for the unique aspects of brain morphology across individual  
427 canines. In dogs, we found a significant main effect for the differentiation between odor types,  
428 similar to human studies of olfactory processing, but over a much larger region of cortex. In other  
429 nonhumans, imaging mammalian olfactory cortex may prove difficult due to the resulting signal loss  
430 from the air-to-tissue contact in regions near the olfactory bulbs. That said, fMRI of odor processing  
431 in canines within this primary sensory region may offer opportunities to understand the mechanisms  
432 of odor perception above and beyond what is possible in human fMRI.

433 Second, while humans use language to describe events and percepts, odors are difficult to describe  
434 verbally (Cain, de Wijk, Lulejian, Schiet, & See, 1998; Iatropoulos et al., 2018). When odors are

435 administered during language-dependent tasks, interference occurs when the odor and label are  
436 simultaneously processed. This difficulty is thought to be due to limitations in cortical networks, as  
437 spatiotemporal patterns produced in neural coding of odors and language are similar. Additionally,  
438 humans' limited language for odors may be a cause for our disregard of this sense compared to our  
439 bias for visual stimuli (Lorig, 1999). Odor naming may also account for some of the difficulty  
440 reported by participants when attempting to evoke images of the odor objects (Stevenson, Case, &  
441 Mahmut, 2007). The inability to name objects based on their olfactory, as opposed to their visual  
442 appearance, may be explained by the brain circuitry involved in associating olfactory and visual  
443 object features to their lexico-semantic representations (Olofsson & Gottfried, 2015; Olofsson et al.,  
444 2014; Olofsson & Wilson, 2018). Dogs prove to be a valuable model for the study of odor processing  
445 because they do not have the confound of language and have unique brain morphology for imaging  
446 of primary olfactory cortex.

447 This study also contributes significantly to the existing literature on odor processing in canines. First,  
448 this study replicates findings from our previous odor fMRI study using the same dogs and the same  
449 odor stimuli (Prichard, Chhibber, et al., 2018). Second, ours is the first study to use data directly from  
450 the awake, unanesthetized dog (i.e. brain imaging) as opposed to behavioral outcomes to assess dogs'  
451 perception of odor mixtures. And in contrast, other canine fMRI studies examining the neural  
452 correlates of odor processing have used restrained or anesthetized subjects (Jia et al., 2014;  
453 Siniscalchi, 2016; Thompkins, Deshpande, Waggoner, & Katz, 2016). Third, we used RFC to  
454 perform decoding of the dog brain with awake, unrestrained dogs. In particular, this study supports  
455 the differences inherent in univariate fMRI analyses compared to MVPA analyses, as the latter do not  
456 classify stimuli based on mean activations (Hebart & Baker, 2018). This allowed us to identify  
457 regions supporting classification of stimuli in addition to those specified in univariate analyses. And  
458 fourth, ours is the first study to use RFC in nonhuman fMRI and to back map the feature importances  
459 into brain space to identify regions that contribute to high classification accuracy. Our novel use of  
460 RFC can inform future brain decoding studies as it offers an alternative approach to popular  
461 searchlight methods for localizing important regions.

462 There are several possible limitations to our study. First, the presence of the human owner was  
463 constant. Because the human was not blind to the nature of the stimuli, they could have inadvertently  
464 influenced the dogs through body language. However, the olfactory stimuli were least likely to be  
465 picked up by the humans and were not communicated by human owners, so Clever-Hans effects are  
466 unlikely to explain these results. Second, the effects of habituation counteract those of learning.  
467 Habituation was perhaps most evident in the amygdala, which displayed a generally declining  
468 response with run across trial types. There is ample evidence that the amygdala habituates to repeated  
469 presentations of the same stimuli and specifically to odor stimuli (Gottfried, O'Doherty, & Dolan,  
470 2002; Plichta et al., 2014; Poellinger et al., 2001; Wright et al., 2001). It would not be surprising that  
471 repeated presentation of the stimuli could lead to decreased physiological response, especially to  
472 odors. Third, the pet dogs that participated in the study were not previously trained on odor-detection  
473 or discrimination (except for two dogs). Highly trained working dogs may perform differently than  
474 pets. However, the results were consistent across dogs that varied in age, breed, and sex, so  
475 generalizability to the population is likely. Fourth, the odor training utilized two component odors  
476 and one mixture, so the findings may not generalize to all odor mixtures or all mixture concentrations  
477 (Schneider et al., 2016). Finally, the stimulus-reward associations were acquired through a passive  
478 task in the scanner. No behavioral tests were conducted to test acquisition of the learned associations  
479 or to compare to the neural activations. This task design was chosen to minimize any additional  
480 training required for the dogs and as a follow-up to our previously published study on odor learning.

481 As in humans, further study may reveal dissociable neural pathways support the associative and  
482 perceptual representations of sensory stimuli (Howard et al., 2016).

483 Our results highlight potential neural mechanisms that underly the perception of odors in dogs. ROI-  
484 based analysis highlights the importance of the amygdala for learned associations and that these  
485 associations are maintained over time. Machine-learning analysis of dogs' perception of an odor  
486 mixture suggests that dogs perceive odor mixtures as new odors rather than as their individual  
487 components. This finding has important implications for the training of odor detection dogs and  
488 serves as a potential mechanism underlying dogs' poor behavioral performance when generalizing  
489 from a target odor to mixture. Future decoding studies of the dog brain may allow us to better  
490 understand canine perception and highlight potential neural mechanisms for olfactory processing  
491 conserved across species.

## 492 **5. Conflict of Interest**

493 G.B. & M.S. own equity in Dog Star Technologies and developed technology used in some of the  
494 research described in this paper. The terms of this arrangement have been reviewed and approved by  
495 Emory University in accordance with its conflict of interest policies. Author M.S. is president of  
496 Comprehensive Pet Therapy. The remaining authors declare that the research was conducted in the  
497 absence of any commercial or financial relationships that could be construed as a potential conflict of  
498 interest.

## 499 **6. Author Contributions**

500 A.P., M.S., and G.B. designed the research; A.P., R.C., K.A. and G.B. collected the data; A.P, M.S.  
501 and G.B trained the dogs, A.P., R.C., J.K., and G.B. analyzed data; and A.P., R. C. and G.B. wrote  
502 the paper.

## 503 **7. Funding**

504 This work was supported by the Office of Naval Research (N00014-16-1-2276). ONR provided  
505 support in the form of salaries [RC, MS, GSB], scan time, and volunteer payment, but did not have  
506 any additional role in the study design, data collection and analysis, decision to publish, or  
507 preparation of the manuscript.

## 508 **8. Acknowledgments**

509 Thank you to all of the owners who trained their dogs to participate in fMRI studies: Lorrie Backer,  
510 Rebecca Beasley, Emily Chapman, Darlene Coyne, Vicki D'Amico, Diana Delatour, Jessa Fagan,  
511 Marianne Ferraro, Anna & Cory Inman, Patricia King, Cecilia Kurland, Claire & Josh Mancebo,  
512 Patti Rudi, Cathy Siler, Lisa Tallant, Nicole & Sairina Merino Tsui, Ashwin Sakhardande, & Yusuf  
513 Uddin. This manuscript has been released as a preprint at bioRxiv.org (Prichard et al., 2019).

## 514 **9. Data Availability Statement**

515 The raw data supporting the conclusions of this manuscript will be made available by the authors,  
516 without undue reservation, to any qualified researcher.

517 **10. References**

- 518 Ache, B. W., & Young, J. M. (2005). Olfaction: diverse species, conserved principles. *Neuron*, *48*(3), 417-430.  
519 doi:10.1016/j.neuron.2005.10.022
- 520 Avants, B. B., Tustison, N. J., Song, G., Cook, P. A., Klein, A., & Gee, J. C. (2011). A reproducible evaluation of  
521 ANTs similarity metric performance in brain image registration. *Neuroimage*, *54*(3), 2033-2044.  
522 doi:10.1016/j.neuroimage.2010.09.025
- 523 Berns, G. S., Brooks, A., & Spivak, M. (2013). Replicability and heterogeneity of awake unrestrained canine  
524 fMRI responses. *PLoS One*, *8*(12), e81698. doi:10.1371/journal.pone.0081698
- 525 Berns, G. S., Brooks, A. M., & Spivak, M. (2012). Functional MRI in awake unrestrained dogs. *PLoS One*, *7*(5),  
526 e38027. doi:10.1371/journal.pone.0038027
- 527 Berns, G. S., Brooks, A. M., & Spivak, M. (2015). Scent of the familiar: An fMRI study of canine brain  
528 responses to familiar and unfamiliar human and dog odors. *Behav Processes*, *110*, 37-46.  
529 doi:10.1016/j.beproc.2014.02.011
- 530 Berns, G. S., & Cook, P. F. (2016). Why did the dog walk into the MRI? *Current Directions in Psychological*  
531 *Science*, *25*(5), 363-369. doi:10.1177/0963721416665006
- 532 Bestgen, A. K., Schulze, P., Kuchinke, L., Suchan, B., Derdak, T., Otto, T., . . . Sucker, K. (2016). An extension of  
533 olfactometry methods: An expandable, fully automated, mobile, MRI-compatible olfactometer. *J*  
534 *Neurosci Methods*, *261*, 85-96. doi:10.1016/j.jneumeth.2015.12.009
- 535 Bijland, L. R., Bomers, M. K., & Smulders, Y. M. (2013). Smelling the diagnosis: A review on the use of scent in  
536 diagnosing disease. *The Netherlands Journal of Medicine*.
- 537 Cain, W. S., de Wijk, R., Lulejian, C., Schiet, F., & See, L. C. (1998). Odor identification: Perceptual and  
538 semantic dimensions. *Chemical Senses*, *23*(3), 309-326. doi:DOI 10.1093/chemse/23.3.309
- 539 Chollet, F. (2018). *Deep learning with python*. NY: Manning.
- 540 Cook, P. F., Prichard, A., Spivak, M., & Berns, G. S. (2016). Awake canine fMRI predicts dogs' preference for  
541 praise vs food. *Soc Cogn Affect Neurosci*, *11*(12), 1853-1862. doi:10.1093/scan/nsw102
- 542 Cooper, R., Wang, C., & Singh, N. (2014). Accuracy of Trained Canines for Detecting Bed Bugs (Hemiptera:  
543 Cimicidae). *J Econ Entomol*, *107*(6), 2171-2181. doi:10.1603/EC14195
- 544 Cuaya, L. V., Hernandez-Perez, R., & Concha, L. (2016). Our Faces in the Dog's Brain: Functional Imaging  
545 Reveals Temporal Cortex Activation during Perception of Human Faces. *PLoS One*, *11*(3), e0149431.  
546 doi:10.1371/journal.pone.0149431
- 547 Datta, R., Lee, J., Duda, J., Avants, B. B., Vite, C. H., Tseng, B., . . . Aguirre, G. K. (2012). A digital atlas of the  
548 dog brain. *PLoS One*, *7*(12), e52140. doi:10.1371/journal.pone.0052140
- 549 Davidson, G. A., Clark, D. A., Johnson, B. K., Waits, L. P., & Adams, J. R. (2014). Estimating Cougar Densities in  
550 Northeast Oregon Using Conservation Detection Dogs. *Journal of Wildlife Management*, *78*(6), 1104-  
551 1114. doi:10.1002/jwmg.758
- 552 DeGreeff, L. E., Malito, M., Katilie, C. J., Brandon, A., Conroy, M. W., Peranich, K., . . . Rose-Pehrsson, S. L.  
553 (2017). Passive delivery of mixed explosives vapor from separated components. *Forensic Chemistry*,  
554 *4*, 19-31. doi:10.1016/j.forc.2017.02.010

- 555 Dilks, D. D., Cook, P., Weiller, S. K., Berns, H. P., Spivak, M., & Berns, G. S. (2015). Awake fMRI reveals a  
556 specialized region in dog temporal cortex for face processing. *PeerJ*, 3, e1115.  
557 doi:10.7717/peerj.1115
- 558 Gadbois, S., & Reeve, C. (2014). Canine Olfaction: Scent, Sign, and Situation. In *Domestic Dog Cognition and*  
559 *Behavior* (pp. 3-29).
- 560 Göth, A., McLean, I. G., & Trevelyan, J. (2003). How do dogs detect landmines? In  
561 Gottfried, J. A., O'Doherty, J., & Dolan, R. J. (2002). Appetitive and aversive olfactory learning in humans  
562 studied using event-related functional magnetic resonance imaging. *Journal of Neuroscience*, 22(24),  
563 10829-10837. doi:22/24/10829 [pii]
- 564 Hall, N. J., & Wynne, C. D. L. (2018). Odor mixture training enhances dogs' olfactory detection of Home-Made  
565 Explosive precursors. *Heliyon*, 4(12), e00947. doi:10.1016/j.heliyon.2018.e00947
- 566 Haxby, J. V., Connolly, A. C., & Guntupalli, J. S. (2014). Decoding neural representational spaces using  
567 multivariate pattern analysis. *Annu Rev Neurosci*, 37, 435-456. doi:10.1146/annurev-neuro-062012-  
568 170325
- 569 Hayes, J. E., McGreevy, P. D., Forbes, S. L., Laing, G., & Stuetz, R. M. (2018). Critical review of dog detection  
570 and the influences of physiology, training, and analytical methodologies. *Talanta*, 185, 499-512.  
571 doi:10.1016/j.talanta.2018.04.010
- 572 Hebart, M. N., & Baker, C. I. (2018). Deconstructing multivariate decoding for the study of brain function.  
573 *Neuroimage*, 180(Pt A), 4-18. doi:10.1016/j.neuroimage.2017.08.005
- 574 Howard, J. D., & Gottfried, J. A. (2014). Configural and elemental coding of natural odor mixture components  
575 in the human brain. *Neuron*, 84(4), 857-869. doi:10.1016/j.neuron.2014.10.012
- 576 Howard, J. D., Gottfried, J. A., Tobler, P. N., & Kahnt, T. (2015). Identity-specific coding of future rewards in  
577 the human orbitofrontal cortex. *Proc Natl Acad Sci U S A*, 112(16), 5195-5200.  
578 doi:10.1073/pnas.1503550112
- 579 Howard, J. D., Kahnt, T., & Gottfried, J. A. (2016). Converging prefrontal pathways support associative and  
580 perceptual features of conditioned stimuli. *Nat Commun*, 7, 11546. doi:10.1038/ncomms11546
- 581 Hummel, T., Olgun, S., Gerber, J., Huchel, U., & Frasnelli, J. (2013). Brain responses to odor mixtures with  
582 sub-threshold components. *Front Psychol*, 4, 786. doi:10.3389/fpsyg.2013.00786
- 583 Iatropoulos, G., Herman, P., Lansner, A., Karlgren, J., Larsson, M., & Olofsson, J. K. (2018). The language of  
584 smell: Connecting linguistic and psychophysical properties of odor descriptors. *Cognition*, 178, 37-49.  
585 doi:10.1016/j.cognition.2018.05.007
- 586 Jia, H., Pustovyy, O. M., Waggoner, P., Beyers, R. J., Schumacher, J., Wildey, C., . . . Deshpande, G. (2014).  
587 Functional MRI of the olfactory system in conscious dogs. *PLoS One*, 9(1), e86362.  
588 doi:10.1371/journal.pone.0086362
- 589 Jin, J., Zelano, C., Gottfried, J. A., & Mohanty, A. (2015). Human Amygdala Represents the Complete  
590 Spectrum of Subjective Valence. *J Neurosci*, 35(45), 15145-15156. doi:10.1523/JNEUROSCI.2450-  
591 15.2015
- 592 Johnen, D., Heuwieser, W., & Fischer-Tenhagen, C. (2017). An approach to identify bias in scent detection  
593 dog testing. *Applied Animal Behaviour Science*, 189, 1-12. doi:10.1016/j.applanim.2017.01.001
- 594 Kahnt, T. (2018). A decade of decoding reward-related fMRI signals and where we go from here.  
595 *Neuroimage*, 180(Pt A), 324-333. doi:10.1016/j.neuroimage.2017.03.067
- 596 Kahnt, T., Park, S. Q., Haynes, J. D., & Tobler, P. N. (2014). Disentangling neural representations of value and  
597 salience in the human brain. *Proc Natl Acad Sci U S A*, 111(13), 5000-5005.  
598 doi:10.1073/pnas.1320189111
- 599 Lazarowski, L., & Dorman, D. C. (2014). Explosives detection by military working dogs: Olfactory  
600 generalization from components to mixtures. *Applied Animal Behaviour Science*, 151, 84-93.  
601 doi:10.1016/j.applanim.2013.11.010
- 602 Lazarowski, L., Foster, M. L., Gruen, M. E., Sherman, B. L., Fish, R. E., Milgram, N. W., & Dorman, D. C. (2015).  
603 Olfactory discrimination and generalization of ammonium nitrate and structurally related odorants in  
604 Labrador retrievers. *Anim Cogn*, 18(6), 1255-1265. doi:10.1007/s10071-015-0894-9

- 605 Lorig, T. S. (1999). On the similarity of odor and language perception. *Neurosci Biobehav Rev*, 23(3), 391-398.  
606 doi:10.1016/S0149-7634(98)00041-4
- 607 Lorig, T. S. (2012). Beyond Self-report: Brain Imaging at the Threshold of Odor Perception. *Chemosensory*  
608 *Perception*, 5(1), 46-54. doi:10.1007/s12078-012-9116-x
- 609 Lowen, S. B., & Lukas, S. E. (2006). A low-cost, MR-compatible olfactometer. *Behav Res Methods*, 38(2), 307-  
610 313. doi:10.3758/BF03192782
- 611 Misaki, M., Kim, Y., Bandettini, P. A., & Kriegeskorte, N. (2010). Comparison of multivariate classifiers and  
612 response normalizations for pattern-information fMRI. *Neuroimage*, 53(1), 103-118.  
613 doi:10.1016/j.neuroimage.2010.05.051
- 614 Olofsson, J. K., & Gottfried, J. A. (2015). The muted sense: neurocognitive limitations of olfactory language.  
615 *Trends Cogn Sci*, 19(6), 314-321. doi:10.1016/j.tics.2015.04.007
- 616 Olofsson, J. K., Hurley, R. S., Bowman, N. E., Bao, X., Mesulam, M. M., & Gottfried, J. A. (2014). A designated  
617 odor-language integration system in the human brain. *J Neurosci*, 34(45), 14864-14873.  
618 doi:10.1523/JNEUROSCI.2247-14.2014
- 619 Olofsson, J. K., & Wilson, D. A. (2018). Human Olfaction: It Takes Two Villages. *Curr Biol*, 28(3), R108-R110.  
620 doi:10.1016/j.cub.2017.12.016
- 621 Plichta, M. M., Grimm, O., Morgen, K., Mier, D., Sauer, C., Haddad, L., . . . Meyer-Lindenberg, A. (2014).  
622 Amygdala habituation: A reliable fMRI phenotype. *Neuroimage*, 103, 383-390.  
623 doi:10.1016/j.neuroimage.2014.09.059
- 624 Poellinger, A., Thomas, R., Lio, P., Lee, A., Makris, N., Rosen, B. R., & Kwong, K. K. (2001). Activation and  
625 habituation in olfaction-an fMRI study. *Neuroimage*, 13(4), 547-560. doi:10.1006/nimg.2000.0713
- 626 Prichard, A., Chhibber, R., Athanassiades, K., Spivak, M., & Berns, G. S. (2018). Fast neural learning in dogs: A  
627 multimodal sensory fMRI study. *Sci Rep*, 8(1), 14614. doi:10.1038/s41598-018-32990-2
- 628 Prichard, A., Chhibber, R., King, J., Athanassiades, K., Spivak, M., & Berns, G.S. (2019) Decoding odor mixtures  
629 in the dog brain: an awake fMRI study. *bioRxiv* 754374. doi: <https://doi.org/10.1101/754374>
- 630 Prichard, A., Cook, P. F., Spivak, M., Chhibber, R., & Berns, G. S. (2018). Awake fMRI Reveals Brain Regions for  
631 Novel Word Detection in Dogs. *Front Neurosci*, 12, 737. doi:10.3389/fnins.2018.00737
- 632 Qu, L. P., Kahnt, T., Cole, S. M., & Gottfried, J. A. (2016). De Novo Emergence of Odor Category  
633 Representations in the Human Brain. *J Neurosci*, 36(2), 468-478. doi:10.1523/JNEUROSCI.3248-  
634 15.2016
- 635 Schneider, N. Y., Datiche, F., Wilson, D. A., Gigot, V., Thomas-Danguin, T., Ferreira, G., & Coureaud, G. (2016).  
636 Brain processing of a configural vs elemental odor mixture in the newborn rabbit. *Brain Struct Funct*,  
637 221(5), 2527-2539. doi:10.1007/s00429-015-1055-2
- 638 Sezille, C., Messaoudi, B., Bertrand, A., Jousain, P., Thevenet, M., & Bensafi, M. (2013). A portable  
639 experimental apparatus for human olfactory fMRI experiments. *J Neurosci Methods*, 218(1), 29-38.  
640 doi:10.1016/j.jneumeth.2013.04.021
- 641 Siniscalchi, M. (2016). Olfaction and the canine brain. In T. Jezierski, J. Ensminger, & L. E. Papet (Eds.), *Canine*  
642 *Olfaction, Science, and Law*: CRC Press.
- 643 Sommer, J. U., Maboche, W., Griebe, M., Heiser, C., Hormann, K., Stuck, B. A., & Hummel, T. (2012). A mobile  
644 olfactometer for fMRI-studies. *J Neurosci Methods*, 209(1), 189-194.  
645 doi:10.1016/j.jneumeth.2012.05.026
- 646 Stelzer, J., Chen, Y., & Turner, R. (2013). Statistical inference and multiple testing correction in classification-  
647 based multi-voxel pattern analysis (MVPA): random permutations and cluster size control.  
648 *Neuroimage*, 65, 69-82. doi:10.1016/j.neuroimage.2012.09.063
- 649 Stevenson, R. J., Case, T. I., & Mahmut, M. (2007). Difficulty in evoking odor images: the role of odor naming.  
650 *Mem Cognit*, 35(3), 578-589. Retrieved from <https://www.ncbi.nlm.nih.gov/pubmed/17691155>
- 651 Thomas-Danguin, T., Sinding, C., Romagny, S., El Mountassir, F., Atanasova, B., Le Berre, E., . . . Coureaud, G.  
652 (2014). The perception of odor objects in everyday life: a review on the processing of odor mixtures.  
653 *Front Psychol*, 5, 504. doi:10.3389/fpsyg.2014.00504

- 654 Thompkins, A. M., Deshpande, G., Waggoner, P., & Katz, J. S. (2016). Functional Magnetic Resonance Imaging  
655 of the Domestic Dog: Research, Methodology, and Conceptual Issues. *Comp Cogn Behav Rev*,  
656 *11*(April), 63-82. doi:10.3819/ccbr.2016.110004
- 657 Toledano, A., Borromeo, S., Luna, G., Molina, E., Solana, A. B., Garcia-Polo, P., . . . Alvarez-linera, J. (2012).  
658 Objective assessment of olfactory function using functional magnetic resonance imaging. *Acta*  
659 *Otorrinolaringol Esp*, *63*(4), 280-285. doi:10.1016/j.otorri.2012.01.010
- 660 Vedaei, F., Oghabian, M. A., Firouznia, K., Harirchian, M. H., Lotfi, Y., & Fakhri, M. (2017). The Human  
661 Olfactory System: Cortical Brain Mapping Using fMRI. *Iranian Journal of Radiology*, *14*(2).  
662 doi:10.5812/iranjradiol.16250
- 663 Vigouroux, M., Bertrand, B., Farget, V., Plailly, J., & Royet, J. P. (2005). A stimulation method using odors  
664 suitable for PET and fMRI studies with recording of physiological and behavioral signals. *J Neurosci*  
665 *Methods*, *142*(1), 35-44. doi:10.1016/j.jneumeth.2004.07.010
- 666 Wright, C. I., Fischer, H., Whalen, P. J., McInerney, S. C., Shin, L. M., & Rauch, S. L. (2001). Differential  
667 prefrontal cortex and amygdala habituation to repeatedly presented emotional stimuli. *NeuroReport*,  
668 *12*(2), 379-383. doi:10.1097/00001756-200102120-00039
- 669 Yeshurun, Y., Lapid, H., Dudai, Y., & Sobel, N. (2009). The privileged brain representation of first olfactory  
670 associations. *Curr Biol*, *19*(21), 1869-1874. doi:10.1016/j.cub.2009.09.066
- 671 Zelano, C., Mohanty, A., & Gottfried, J. A. (2011). Olfactory predictive codes and stimulus templates in  
672 piriform cortex. *Neuron*, *72*(1), 178-187. doi:10.1016/j.neuron.2011.08.010

673



674 **TABLES**

675 **Table 1. Dogs (N=18) and odor stimulus paired with reward.**

| <b>Dog</b> | <b>Breed</b>             | <b>Sex</b> | <b>Reward Odor</b> |
|------------|--------------------------|------------|--------------------|
| BhuBo      | Boxer mix                | M          | hexanol            |
| Caylin     | Border collie            | F          | hexanol            |
| Daisy      | Pitbull mix              | F          | hexanol            |
| Eddie      | Labrador Golden mix      | M          | isoamyl acetate    |
| Kady       | Labrador                 | F          | hexanol            |
| Koda       | Pitbull mix              | F          | isoamyl acetate    |
| Libby      | Pitbull mix              | F          | hexanol            |
| Mauja      | Cattle dog mix           | F          | hexanol            |
| Ninja      | Cattle dog mix           | F          | isoamyl acetate    |
| Ohana      | Golden Retriever         | F          | hexanol            |
| Ollie      | Border collie Beagle mix | M          | isoamyl acetate    |
| Pearl      | Golden Retriever         | F          | hexanol            |
| Tallulah   | Cattle Dog mix           | F          | hexanol            |
| Truffles   | Pointer mix              | F          | isoamyl acetate    |
| Tug        | Portuguese Water dog     | M          | hexanol            |
| Velcro     | Viszla                   | M          | isoamyl acetate    |
| Wil        | Australian Shepherd      | M          | isoamyl acetate    |
| Zen        | Labrador Golden mix      | M          | isoamyl acetate    |

676 Dog's names, breed, sex, and odor stimuli (S+) are listed

677

678 **Table 2. Model results for Odor Type, Run, and ROI.** Asterisks denote significant results.

| ROI       | Fixed Effects   | Numerator | Denominator | <i>F</i> | <i>Sig.</i> |
|-----------|-----------------|-----------|-------------|----------|-------------|
|           |                 | df        | df          |          |             |
| Caudate   | Intercept       | 1         | 2580        | 0.265    | 0.606       |
|           | Run             | 3         | 2580        | 0.607    | 0.611       |
|           | Odor Type       | 2         | 2580        | 2.056    | 0.128       |
|           | Run * Odor Type | 6         | 2580        | 2.529    | 0.019*      |
| Amygdala  | Intercept       | 1         | 2426        | 12.831   | 0.000*      |
|           | Run             | 3         | 2426        | 2.068    | 0.102       |
|           | Odor Type       | 2         | 2426        | 11.016   | 0.000*      |
|           | Run * Odor Type | 6         | 2426        | 2.37     | 0.028*      |
| Olfactory | Intercept       | 1         | 1296        | 0.143    | 0.706       |
| Bulbs     | Run             | 3         | 1296        | 0.592    | 0.62        |
|           | Odor Type       | 2         | 1296        | 3.539    | 0.029*      |
|           | Run * Odor Type | 6         | 1296        | 0.746    | 0.613       |

679

680

681 **Table 3. Performance of multiclass and multilabel models.**

|                   |                  | <i>Precision</i> | <i>Recall</i> | <i>F1</i> |
|-------------------|------------------|------------------|---------------|-----------|
| <i>Multiclass</i> | Reward           | 0.59             | 0.33          | 0.43      |
|                   | No Reward        | 0.55             | 0.46          | 0.50      |
|                   | Mixture          | 0.15             | 0.45          | 0.22      |
|                   | Weighted Average | 0.52             | 0.40          | 0.44      |
| <i>Multilabel</i> | Reward           | 0.66             | 0.03          | 0.06      |
|                   | No Reward        | 0.67             | 0.08          | 0.14      |
|                   | Mixture          | 0.12             | 0.91          | 0.21      |
|                   | Weighted Average | 0.60             | 0.19          | 0.14      |

682

683

684 **FIGURES**

685 **Figure 1. Experimental design with odor stimuli.** Three odor stimuli were repeatedly presented  
686 during a scan session. One stimulus was associated with food (Reward), while the No Reward and  
687 Mixture stimuli were associated with nothing. Presentation of odorants to dog in MRI bore via  
688 experimenter-controlled olfactometer during scan session. The owner remained in front of the dog.  
689

690 **Figure 2. Regions of interest (ROIs).** ROIs were drawn in individual anatomical space, example  
691 ROIs shown in template space here in transverse and dorsal views. **A)** Caudate nuclei have been  
692 shown to differentially respond to odor stimuli associated with reward and no-reward. **B)** Amygdalae  
693 have shown differential responding to odor stimuli associated with reward and no-reward, as well as  
694 arousal. **C)** Olfactory bulbs including olfactory bulbs respond to odor stimuli. ROI is shown here in  
695 sagittal and dorsal views in template space.  
696

697 **Figure 3. Schematic diagram of MVPA methods.** A random forest classifier (RFC) was trained on  
698 a balanced subset of the real data, outputting a map of voxels important for classification. We  
699 repeated this process 100 times to ensure that all samples were used at least one. The maps from  
700 these 100 repetitions were averaged, normalized to group space, and thresholded at a voxel and  
701 cluster level to create the final image. To determine the voxel and cluster-level thresholds, we created  
702 random data by permuting the data labels associated with each volume, then trained as described  
703 above for the real data, which constituted one permutation. The data were permuted 100 times and  
704 one map was selected at random to transform into group space. We generated 10,000 random group  
705 maps, created a voxel-by-voxel distribution and a cluster distribution, which were then applied to the  
706 image generated by the real data.  
707

708 **Figure 4. Percent signal change by ROI for odor stimuli.** Mean values of odorant responses across  
709 dogs by ROI and by trial type are plotted relative to the implicit baseline (*blue* = reward, *red* = no  
710 reward, *purple* = mixture of reward and no reward). Error bars denote the standard error of the mean  
711 across dogs. Averaged beta values in the caudate did not show significant differentiation between  
712 odorants. The amygdala showed marked differentiation between odor stimuli, with the greatest  
713 activation to odor stimuli associated with reward. The olfactory bulbs followed a similar pattern of  
714 activation to the caudate. Across all ROIs, the neural activation to the mixture of odors was most  
715 similar to the neural response during the presentation of the no reward odor.  
716

717 **Figure 5. Percent signal change by ROI for reward and mixture odors relative to no reward  
718 odor.** Mean values across dogs are plotted for each run (*blue* = Reward— No Reward, *purple* =  
719 Mixture— No Reward) and averages across all runs (*right*). Error bars denote the standard error of  
720 the mean across dogs. There were main effects of odor type across all ROIs ( $p = 0.004$ ), which were  
721 significantly different by odor type ( $p < 0.001$ ). There was a significant interaction ROI and Run ( $p =$   
722  $0.031$ ), suggesting the magnitude of the effect changed over time. **A)** Averaged beta values in the  
723 caudate show a significant interaction between Run and Odor Type ( $p = 0.036$ ). **B)** Averaged beta  
724 values in the amygdala show significant effects of Odor Type ( $p = 0.001$ ). **C)** Following corrections  
725 for multiple comparisons, activations in the olfactory bulbs were not significantly different.  
726

727 **Figure 6. Clusters of informative voxels for multiclass random forest classifier.** Three clusters  
728 were identified in the 8 dogs whose whole-brain classifier performed at the 90<sup>th</sup> percentile of a null  
729 distribution. Two clusters bracketed the amygdala (*left* and *middle*) while the third cluster was  
730 located in the posterior cingulate (*right*). Voxel and cluster level significance is  $p = 0.005$  and  $p =$   
731  $0.001$  respectively. Color indicates feature importance in terms of bits information gain ( $\times 10^{-4}$ ).

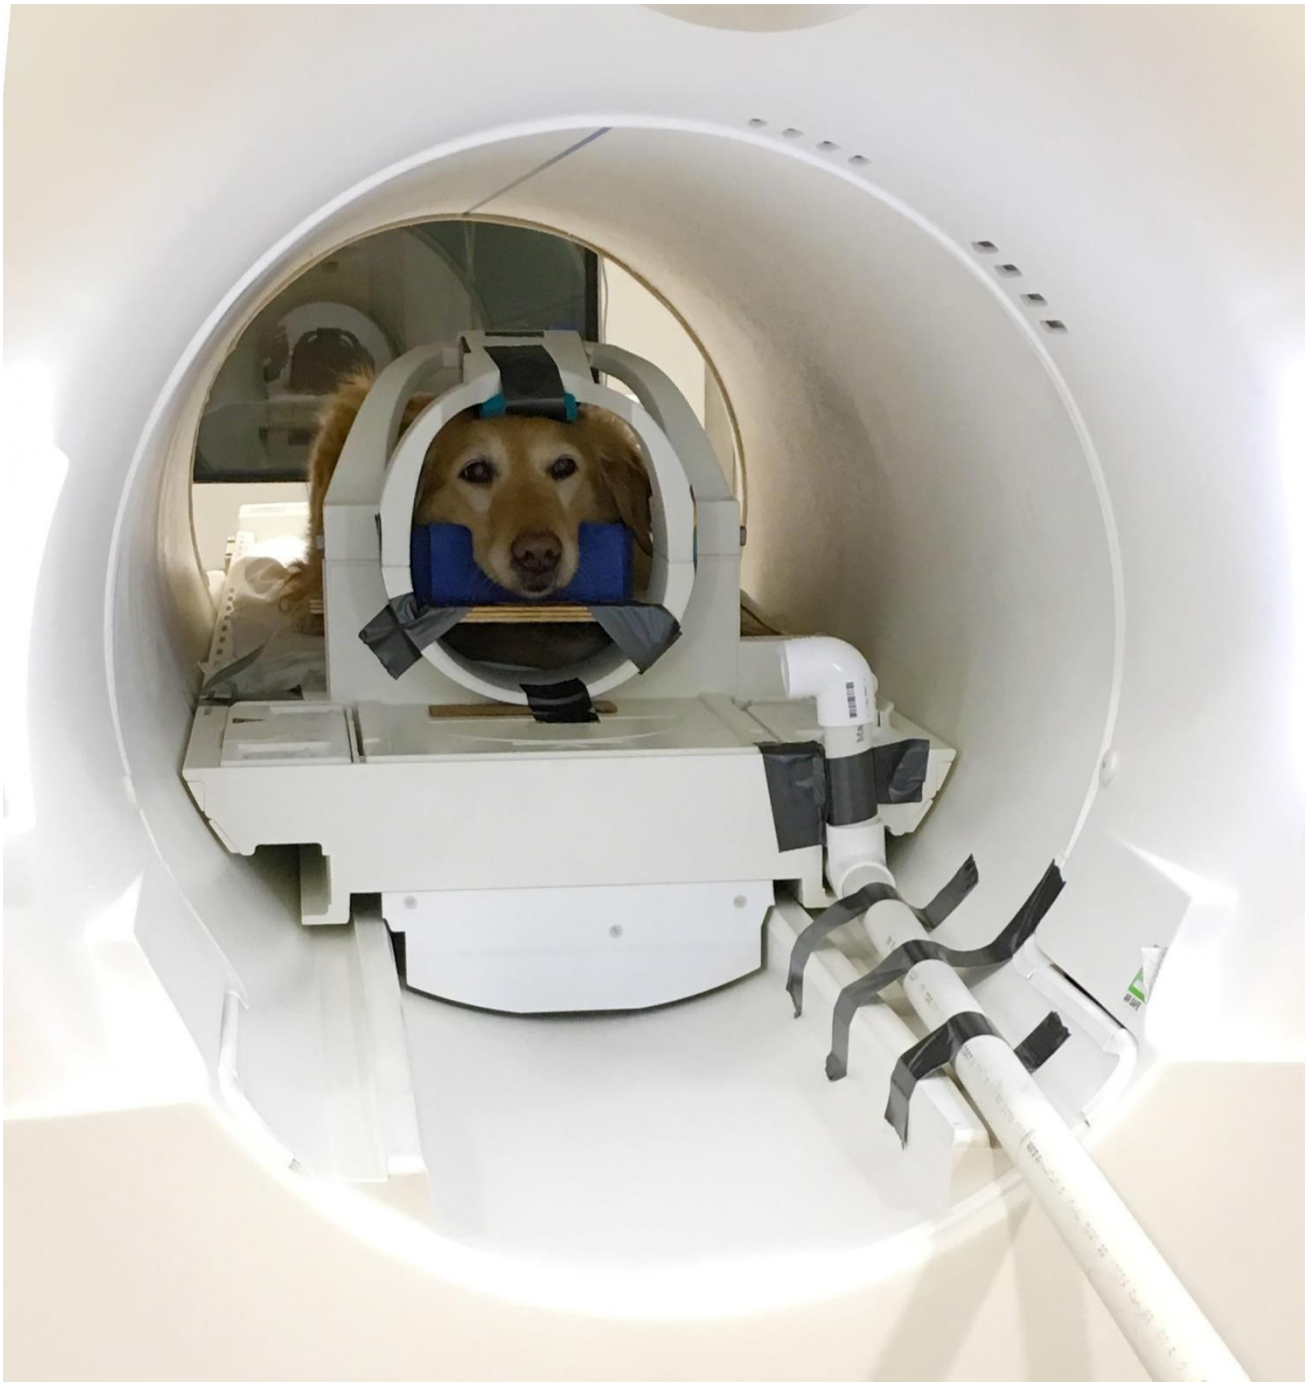

733

734

Figure 1

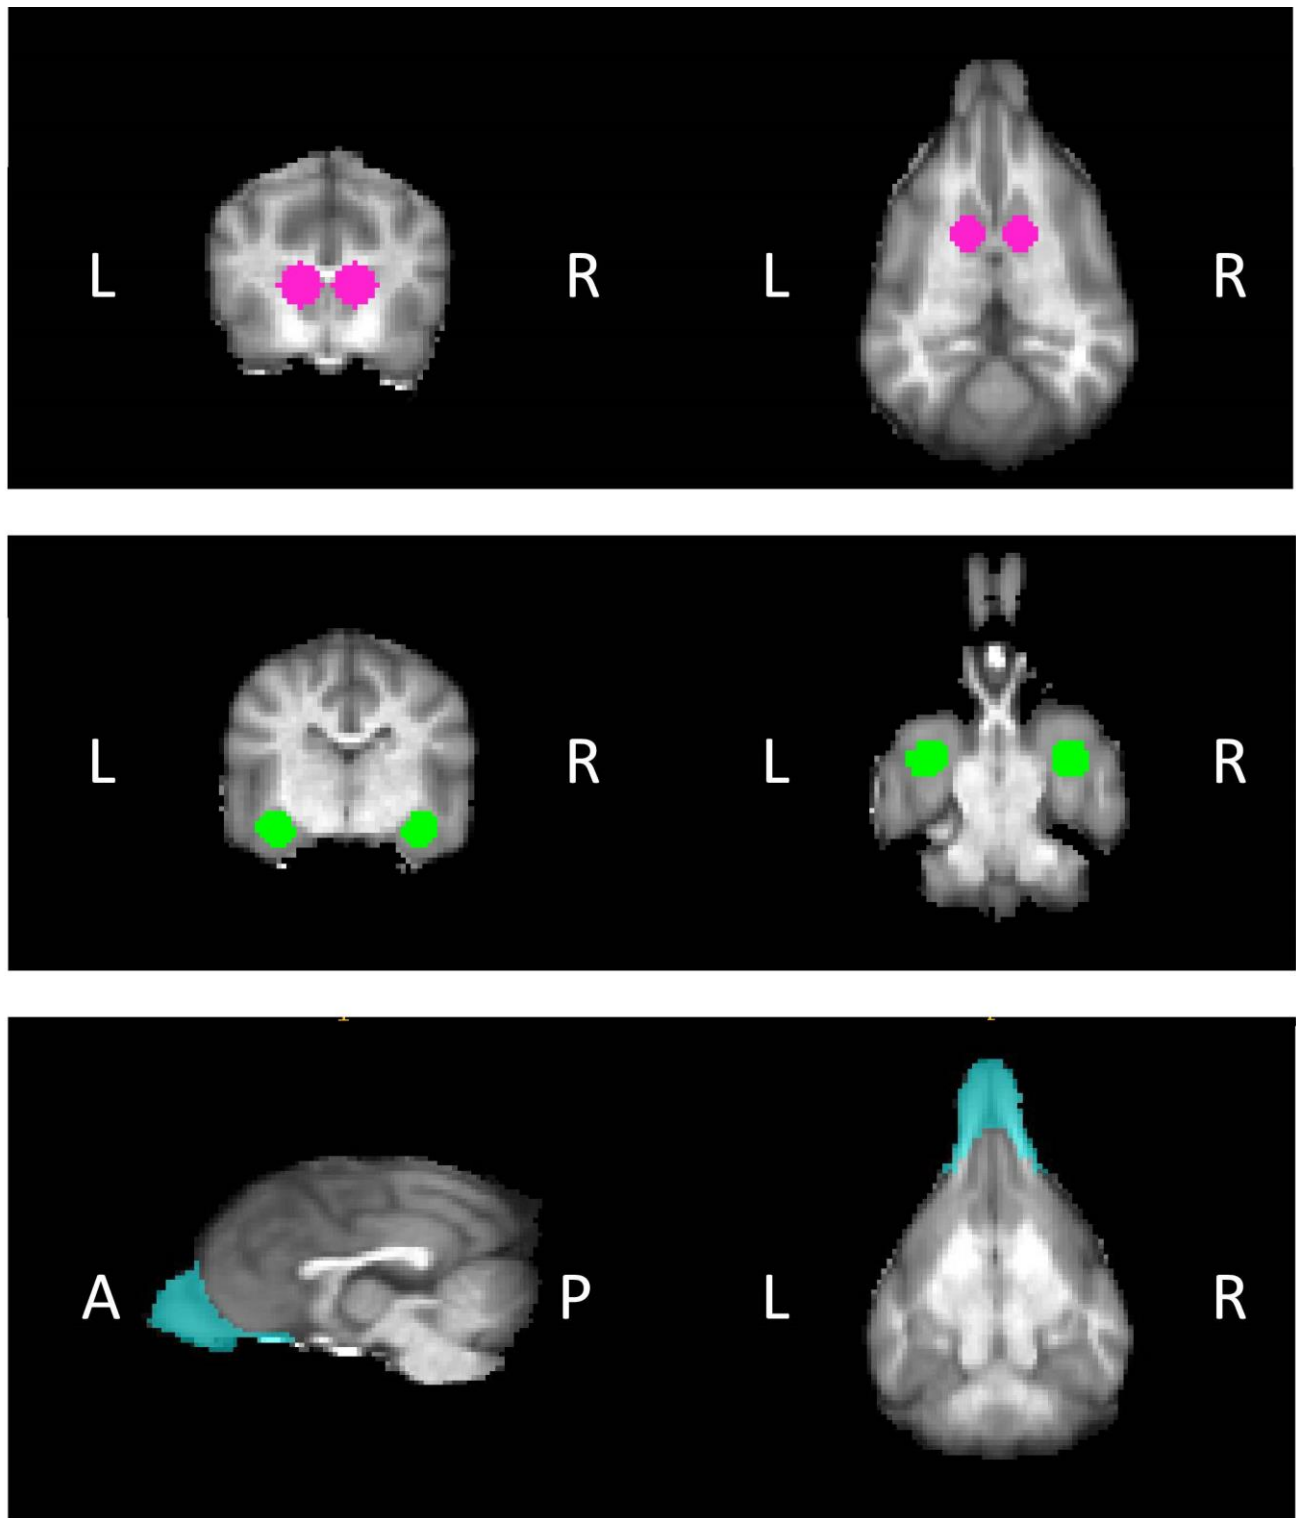

Figure 2

735

736

737

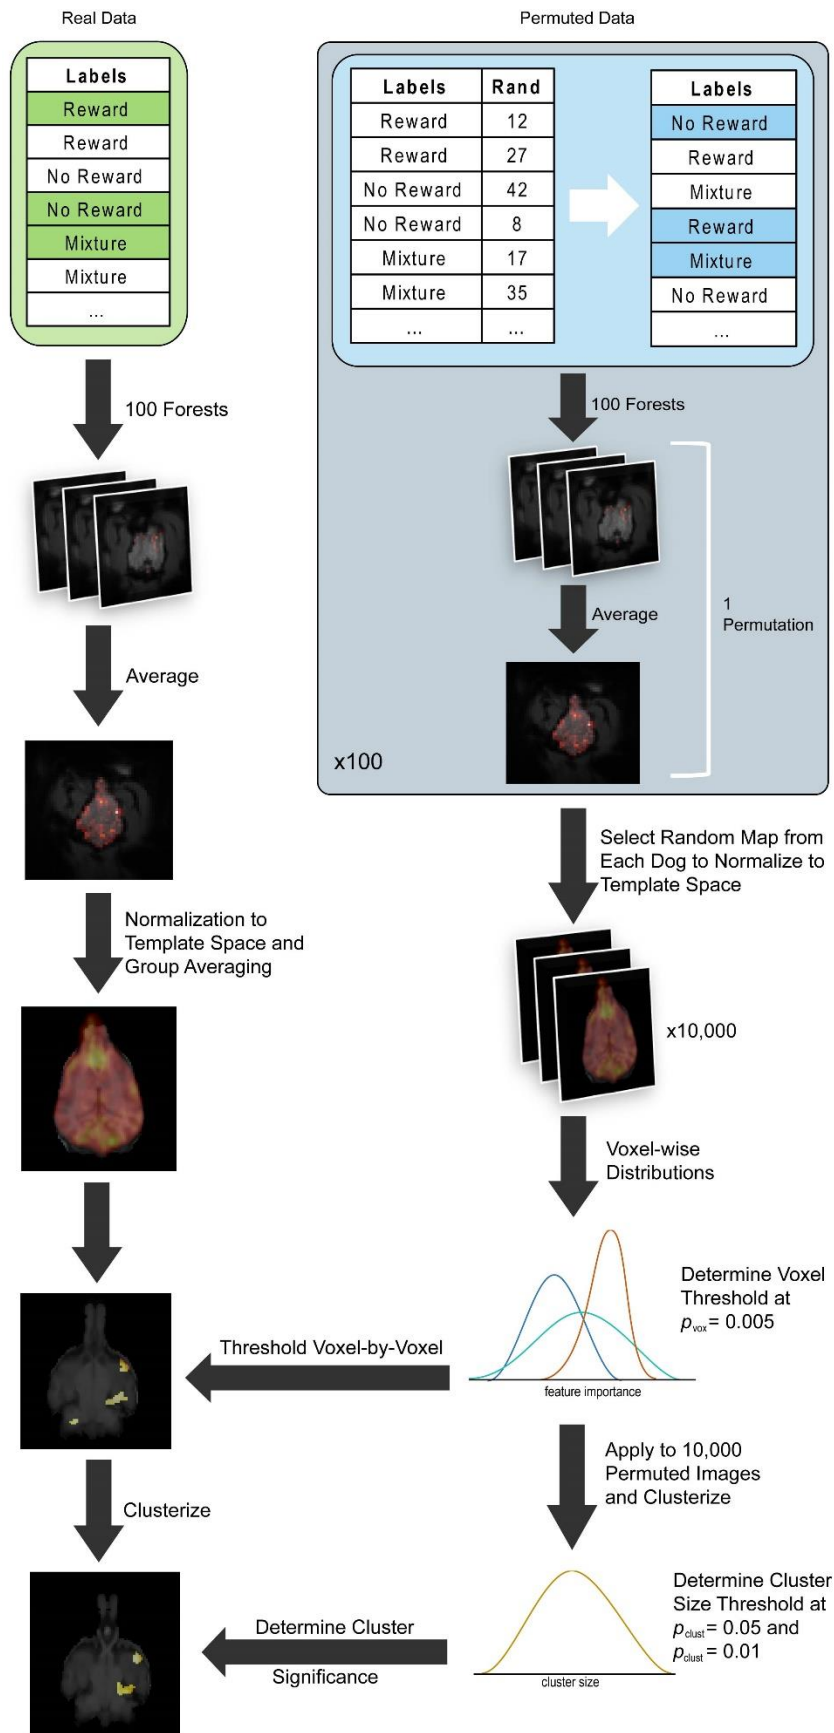

738

739

Figure 3

## Odor Mixtures in Dogs' Brains

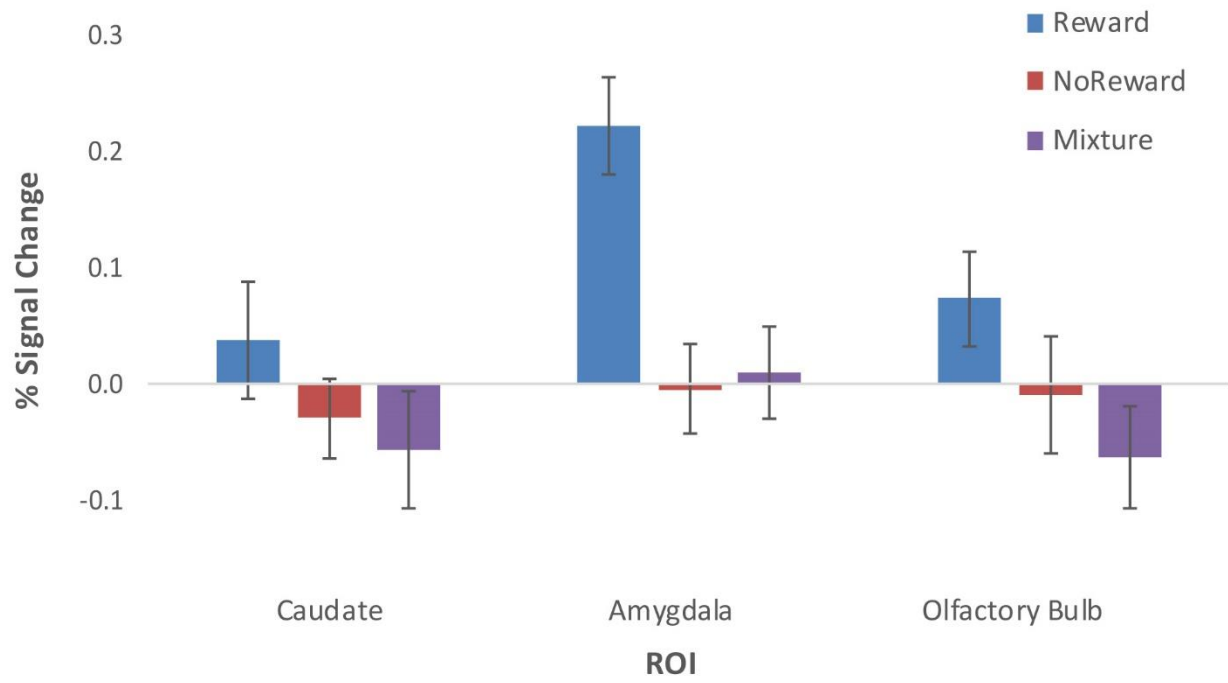

740

741

Figure 4

## Odor Mixtures in Dogs' Brains

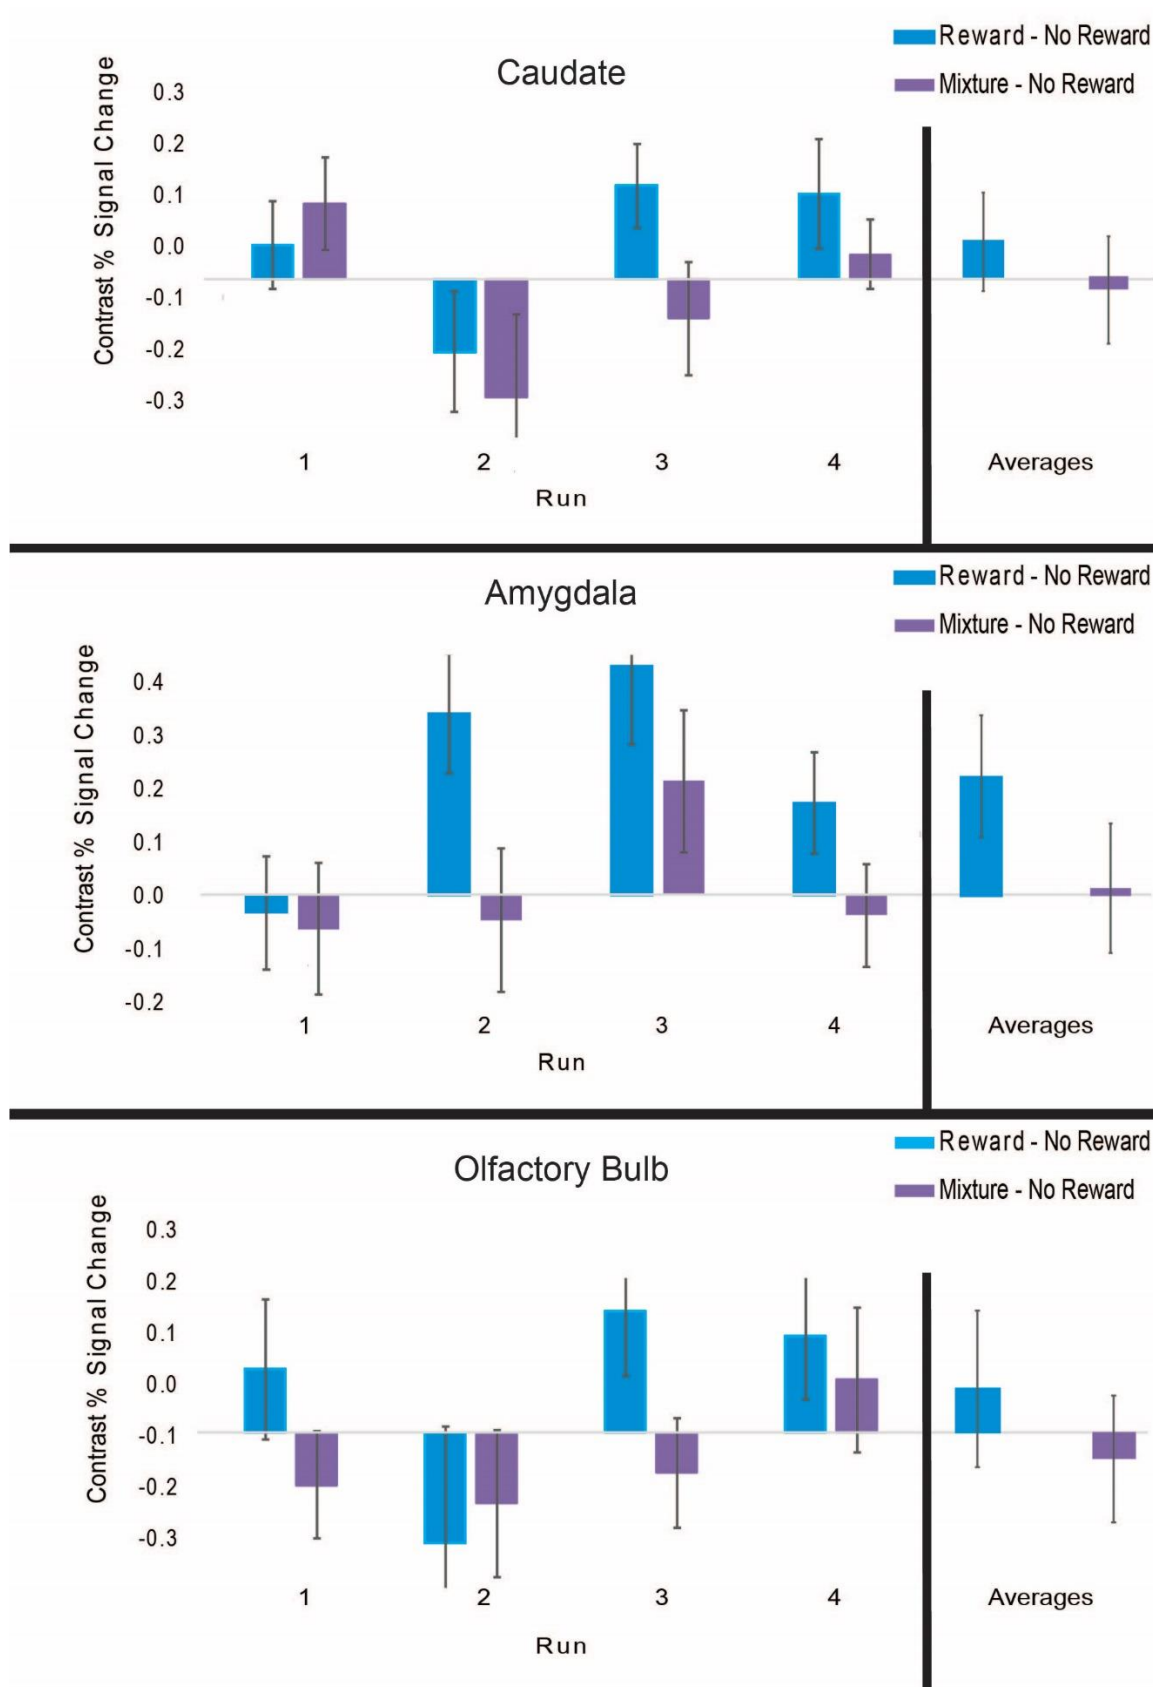

Figure 5

742

743

744



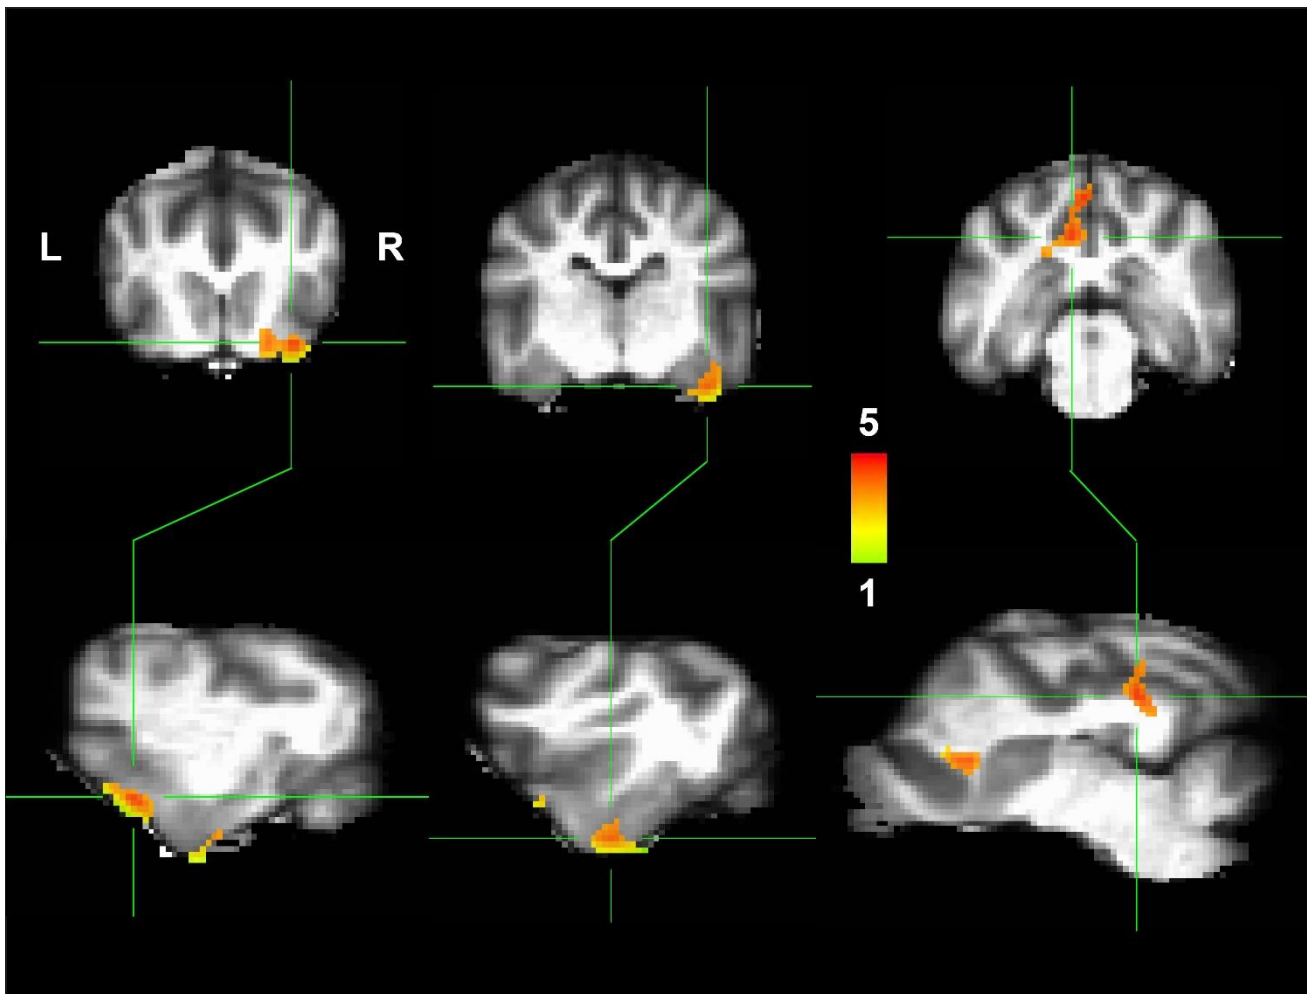

745

746

Figure 6
